# Supplementary material for: Cutibacterium acnes Induces the Expression of Immunosuppressive Genes in Macrophages and is Associated with an Increase of Regulatory T-Cells in Prostate Cancer
Source: PubMed Central journal article supplement (PMC8694172; doi:10.1128/spectrum.01497-21), 2021-12-22

Raw data mean value mRNA  $\Delta$ Ct, macrophage donor (1-3) and repeated measures (1-3), log<sub>10</sub>  $\Delta$ Ct (dCt) for CCL2, CSF1 and CCL22.

| Macrophage donor 1        | ccl2mRNA $\Delta$ ct  | ccl2 mRNA $\Delta$ ct+7 | ccl2mRNA $\Delta$ ct+7<br>log <sub>10</sub> value for<br>SPSS |
|---------------------------|-----------------------|-------------------------|---------------------------------------------------------------|
| mo k 1.1                  | 1,458327611           | 8,458327611             | 0,9272                                                        |
| mo k 1.2                  | 0,954372724           | 7,954372724             | 0,9006                                                        |
| mo k 1.3                  | 0,963564237           | 7,963564237             | 0,9011                                                        |
| mo typl 1.1               | -4,458788236          | 2,541211764             | 0,405                                                         |
| mo typl 1.2               | -4,179164886          | 2,820835114             | 0,4503                                                        |
| mo typl 1.3               | -3,373573303          | 3,626426697             | 0,5594                                                        |
| mo typll 1.1              | 0,497495015           | 7,497495015             | 0,8749                                                        |
| mo typll 1.2              | 0,370980581           | 7,370980581             | 0,8675                                                        |
| mo typll 1.3              | 0,442392031           | 7,442392031             | 0,8717                                                        |
| <b>Macrophage donor 2</b> |                       |                         |                                                               |
| mo k 2.1                  | -0,396636963          | 6,603363037             | 0,8197                                                        |
| mo k 2.2                  | 0,194731394           | 7,194731394             | 0,857                                                         |
| mo k 2.3                  | -0,485848745          | 6,514151255             | 0,8138                                                        |
| mo typl 2.1               | -5,509380023          | 1,490619977             | 0,1733                                                        |
| mo typl 2.2               | -5,232415199          | 1,767584801             | 0,2473                                                        |
| mo typl 2.3               | -6,10801665           | 0,89198335              | -0,04                                                         |
| mo typll 2.1              | -3,730719248          | 3,269280752             | 0,5144                                                        |
| mo typll 2.2              | -3,173311234          | 3,826688766             | 0,5828                                                        |
| mo typll 2.3              | -3,474483808          | 3,525516192             | 0,5472                                                        |
| <b>Macrophage donor 3</b> |                       |                         |                                                               |
| mo k 3.1                  | 0,008858045           | 7,008858045             | 0,8456                                                        |
| mo k 3.2                  | -0,107248624          | 6,892751376             | 0,8383                                                        |
| mo k 3.3                  | -0,271410942          | 6,728589058             | 0,8279                                                        |
| mo typl 3.1               | -4,23200798           | 2,76799202              | 0,4421                                                        |
| mo typl 3.2               | -3,002209345          | 3,997790655             | 0,6018                                                        |
| mo typl 3.3               | -3,089935621          | 3,910064379             | 0,5921                                                        |
| mo typll 3.1              | -3,741991043          | 3,258008957             | 0,5129                                                        |
| mo typll 3.2              | -4,059759458          | 2,940240542             | 0,4683                                                        |
| mo typll 3.3              | -2,882748286          | 4,117251714             | 0,6146                                                        |
| <b>Macrophage donor 1</b> |                       |                         |                                                               |
| Macrophage donor 1        | CSF1 mRNA $\Delta$ ct | CSF1 mRNA $\Delta$ ct+7 | CSF1 mRNA $\Delta$ ct+7 log <sub>10</sub><br>värde till SPSS  |
| mo k 1.1                  | -2,745598475          | 4,254402                | 0,6288                                                        |
| mo k 1.2                  | -3,557873408          | 3,442127                | 0,5368                                                        |
| mo k 1.3                  | -3,495406787          | 3,504593                | 0,5446                                                        |
| mo typl 1.1               | -1,5681928            | 5,431807                | 0,7349                                                        |
| mo typl 1.2               | -2,126134872          | 4,873865                | 0,6878                                                        |
| mo typl 1.3               | -1,556347847          | 5,443652                | 0,7358                                                        |
| mo typll 1.1              | -2,222839991          | 4,77716                 | 0,6791                                                        |
| mo typll 1.2              | -2,081692378          | 4,918308                | 0,6918                                                        |
| mo typll 1.3              | -1,941713651          | 5,058286                | 0,7039                                                        |
| <b>Macrophage donor 2</b> |                       |                         |                                                               |
| mo k 2.1                  | -2,070074081          | 4,929926                | 0,6928                                                        |
| mo k 2.2                  | -2,410605748          | 4,589394                | 0,6617                                                        |
| mo k 2.3                  | -2,75329717           | 4,246703                | 0,628                                                         |
| mo typl 2.1               | -1,975570361          | 5,02443                 | 0,701                                                         |
| mo typl 2.2               | -2,742402077          | 4,257598                | 0,6291                                                        |
| mo typl 2.3               | -2,658816973          | 4,341183                | 0,6375                                                        |
| mo typll 2.1              | -0,799602191          | 6,200398                | 0,7924                                                        |
| mo typll 2.2              | -0,766606331          | 6,233394                | 0,7947                                                        |
| mo typll 2.3              | -0,888258298          | 6,111742                | 0,7861                                                        |
| <b>Macrophage donor 3</b> |                       |                         |                                                               |
| mo k 3.1                  | -3,91168944           | 3,088311                | 0,4897                                                        |
| mo k 3.2                  | -3,401546796          | 3,598453                | 0,5561                                                        |
| mo k 3.3                  | -3,870518684          | 3,129481                | 0,4954                                                        |
| mo typl 3.1               | -4,485412598          | 2,514587                | 0,4004                                                        |
| mo typl 3.2               | -6,135872046          | 0,864128                | -0,0634                                                       |
| mo typl 3.3               | -5,606117566          | 1,393882                | 0,1442                                                        |
| mo typll 3.1              | -3,948732376          | 3,051268                | 0,4844                                                        |
| mo typll 3.2              | -4,149604162          | 2,850396                | 0,4548                                                        |
| mo typll 3.3              | -3,774078051          | 3,225922                | 0,5086                                                        |

| Macrophage donor 1        | CCL22 mRNA $\Delta$ ct | CCL22 mRNA $\Delta$ ct +7 | CCL22 mRNA $\Delta$ ct+8 log10 value to SPSS |
|---------------------------|------------------------|---------------------------|----------------------------------------------|
| mo k 1.1                  | -4,016192118           | 3,983808                  | 0,6002                                       |
| mo k 1.2                  | -4,302281698           | 3,697718                  | 0,5679                                       |
| mo k 1.3                  | -4,62098821            | 3,379012                  | 0,5287                                       |
| mo typI 1.1               | -4,648969014           | 3,351031                  | 0,5251                                       |
| mo typI 1.2               | -4,243758519           | 3,756241                  | 0,5747                                       |
| mo typI 1.3               | -3,886943181           | 4,113057                  | 0,6114                                       |
| mo typII 1.1              | -4,056514104           | 3,943486                  | 0,5958                                       |
| mo typII 1.2              | -4,302371343           | 3,697629                  | 0,5679                                       |
| mo typII 1.3              | -4,005942663           | 3,994057                  | 0,6014                                       |
| <b>Macrophage donor 2</b> |                        |                           |                                              |
| mo k 2.1                  | -6,06415081            | 1,935849                  | 0,2868                                       |
| mo k 2.2                  | -5,562984149           | 2,437016                  | 0,3868                                       |
| mo k 2.3                  | -5,457440058           | 2,54256                   | 0,4052                                       |
| mo typI 2.1               | -4,544478734           | 3,455521                  | 0,5385                                       |
| mo typI 2.2               | -4,973629634           | 3,02637                   | 0,4809                                       |
| mo typI 2.3               | -5,374159495           | 2,625841                  | 0,4192                                       |
| mo typII 2.1              | -3,703272502           | 4,296727                  | 0,6331                                       |
| mo typII 2.2              | -3,864143372           | 4,135857                  | 0,6165                                       |
| mo typII 2.3              | -3,814766566           | 4,185233                  | 0,6217                                       |
| <b>Macrophage donor 3</b> |                        |                           |                                              |
| mo k 3.1                  | -5,795724233           | 2,204276                  | 0,3432                                       |
| mo k 3.2                  | -5,648554802           | 2,351445                  | 0,3713                                       |
| mo k 3.3                  | -5,925309181           | 2,074691                  | 0,3169                                       |
| mo typI 3.1               | -7,605340322           | 0,39466                   | -0,4038                                      |
| mo typI 3.2               | -6,004000028           | 1,996                     | 0,3001                                       |
| mo typI 3.3               | -6,442307472           | 1,557693                  | 0,1924                                       |
| mo typII 3.1              | -6,121786753           | 1,878213                  | 0,2737                                       |
| mo typII 3.2              | -4,995523453           | 3,004477                  | 0,4777                                       |
| mo typII 3.3              | -5,62686348            | 2,373137                  | 0,3753                                       |

### mRNA $\Delta$ Ct log10 CCL2 CSF1 and CCL22 analysis SPSS

#### Repeted measures within-subject factor treatment (1-3) and replicates (1-3)

Treatment 1 (untreated macrophage)

Treatment 2 (Macrophage treated with *C. acnes* Typ IA)

Treatment 3 (Macrophage treated with *C. acnes* Type II)

#### CCL2 mRNA

##### Estimates

Measure: MEASURE\_1

| treatment | Mean | Std. Error | 95% Confidence Interval |             |
|-----------|------|------------|-------------------------|-------------|
|           |      |            | Lower Bound             | Upper Bound |
| 1         | .859 | .026       | .749                    | .970        |
| 2         | .381 | .129       | -.174                   | .936        |
| 3         | .650 | .111       | .175                    | 1.126       |

##### Pairwise Comparisons

Measure: MEASURE\_1

| (I) treatment | (J) treatment | Mean Difference (I-J) | Std. Error | Sig. <sup>a</sup> | 95% Confidence Interval for Difference <sup>a</sup> |             |
|---------------|---------------|-----------------------|------------|-------------------|-----------------------------------------------------|-------------|
|               |               |                       |            |                   | Lower Bound                                         | Upper Bound |
| 1             | 2             |                       |            |                   |                                                     |             |
| 1             | 3             |                       |            |                   |                                                     |             |
| 2             | 3             |                       |            |                   |                                                     |             |

|   |   |       |      |      |       |      |
|---|---|-------|------|------|-------|------|
| 1 | 2 | .478  | .120 | .058 | -.040 | .996 |
|   | 3 | .209  | .085 | .134 | -.157 | .575 |
| 2 | 1 | -.478 | .120 | .058 | -.996 | .040 |
|   | 3 | -.269 | .141 | .197 | -.878 | .339 |
| 3 | 1 | -.209 | .085 | .134 | -.575 | .157 |
|   | 2 | .269  | .141 | .197 | -.339 | .878 |

Based on estimated marginal means

a. Adjustment for multiple comparisons: Least Significant Difference (equivalent to no adjustments).

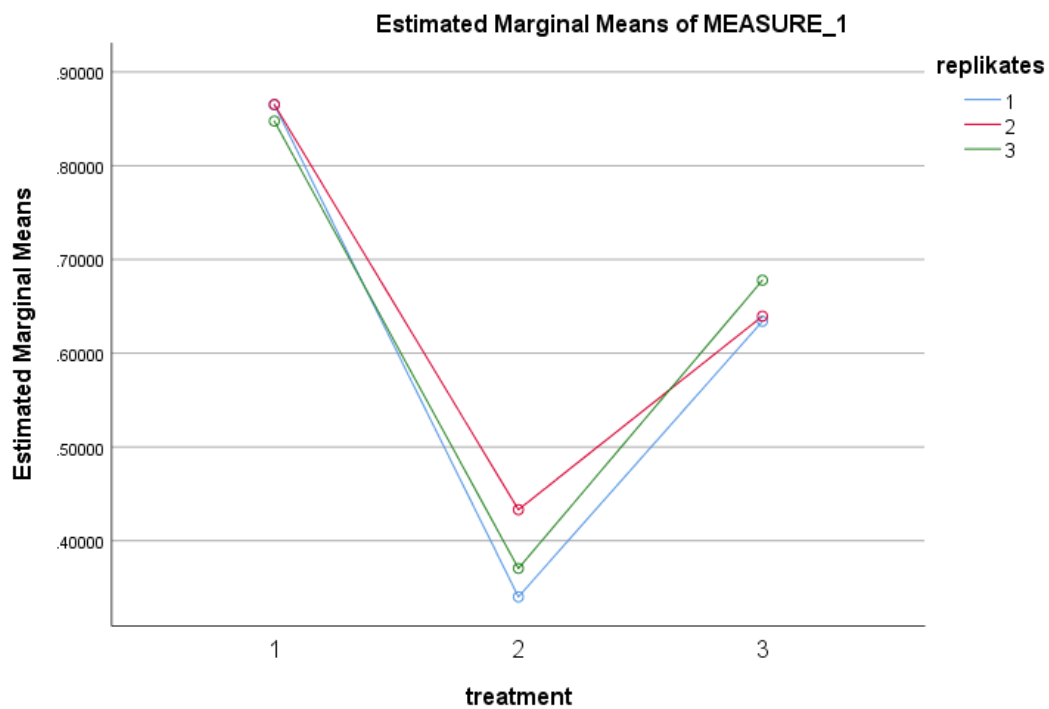

## CSF1 mRNA

### Estimates

Measure: MEASURE\_1

| treatment | Mean | Std. Error | 95% Confidence Interval |             |
|-----------|------|------------|-------------------------|-------------|
|           |      |            | Lower Bound             | Upper Bound |
| 1         | .582 | .043       | .397                    | .766        |
| 2         | .512 | .177       | -.248                   | 1.272       |
| 3         | .655 | .091       | .264                    | 1.046       |

## Pairwise Comparisons

Measure: MEASURE\_1

| (I) treatment | (J) treatment | Mean Difference (I-J) | Std. Error | Sig. <sup>a</sup> | 95% Confidence Interval for Difference <sup>a</sup> |             |
|---------------|---------------|-----------------------|------------|-------------------|-----------------------------------------------------|-------------|
|               |               |                       |            |                   | Lower Bound                                         | Upper Bound |
| 1             | 2             | .070                  | .149       | .686              | -.570                                               | .709        |
|               | 3             | -.074                 | .052       | .296              | -.299                                               | .152        |
| 2             | 1             | -.070                 | .149       | .686              | -.709                                               | .570        |
|               | 3             | -.143                 | .101       | .293              | -.578                                               | .292        |
| 3             | 1             | .074                  | .052       | .296              | -.152                                               | .299        |
|               | 2             | .143                  | .101       | .293              | -.292                                               | .578        |

Based on estimated marginal means

a. Adjustment for multiple comparisons: Least Significant Difference (equivalent to no adjustments).

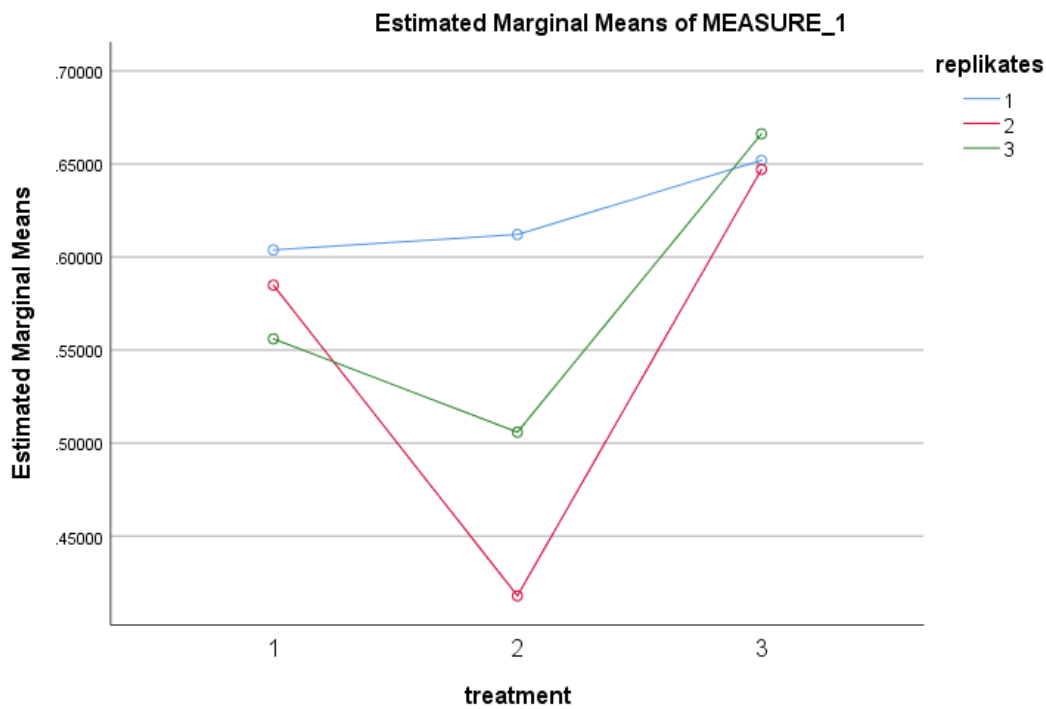

## CCL22 mRNA

### Estimates

Measure: MEASURE\_1

| treatment | Mean | Std. Error | 95% Confidence Interval |             |
|-----------|------|------------|-------------------------|-------------|
|           |      |            | Lower Bound             | Upper Bound |
| 1         | .423 | .071       | .116                    | .730        |
| 2         | .360 | .167       | -.360                   | 1.079       |
| 3         | .529 | .078       | .196                    | .863        |

## Pairwise Comparisons

Measure: MEASURE\_1

| (I) treatment | (J) treatment | Mean Difference (I-J) | Std. Error | Sig. <sup>a</sup> | 95% Confidence Interval for Difference <sup>a</sup> |             |
|---------------|---------------|-----------------------|------------|-------------------|-----------------------------------------------------|-------------|
|               |               |                       |            |                   | Lower Bound                                         | Upper Bound |
| 1             | 2             | .063                  | .130       | .675              | -.496                                               | .622        |
|               | 3             | -.106                 | .079       | .311              | -.446                                               | .234        |
| 2             | 1             | -.063                 | .130       | .675              | -.622                                               | .496        |
|               | 3             | -.169                 | .096       | .218              | -.580                                               | .242        |
| 3             | 1             | .106                  | .079       | .311              | -.234                                               | .446        |
|               | 2             | .169                  | .096       | .218              | -.242                                               | .580        |

Based on estimated marginal means

a. Adjustment for multiple comparisons: Least Significant Difference (equivalent to no adjustments).

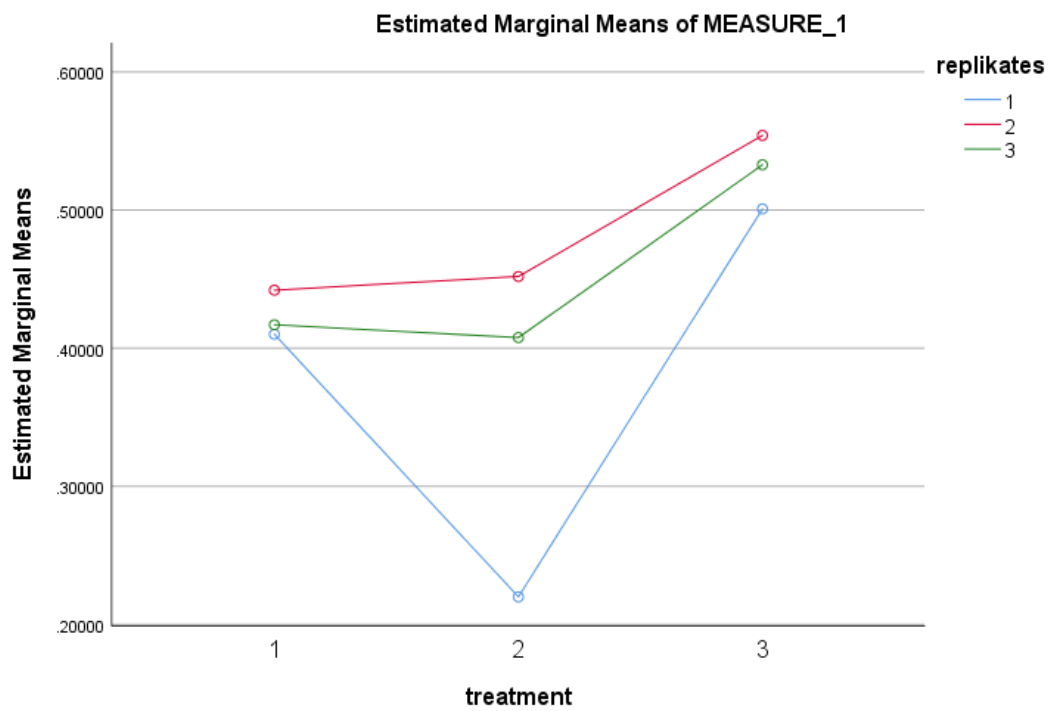

Supplement: spectrum01497-21_supp_1_seq7.pdf [file spectrum01497-21_supp_1_seq7.pdf]
